# Supplementary material for: The Functional Consequences of Variation in Transcription Factor Binding
Source: PubMed Central journal article supplement (PMC3945204; doi:10.1371/journal.pgen.1004226), 2014-03-06
Supplement: pgen.1004226.s014.pdf [file pgen.1004226.s014.pdf]

| Factor  | Expressed |          | +/- 1kb from TSS |                    |                        | +/- 5kb from TSS |                    |                        | +/- 10kb from TSS |                    |                        | +/- 20kb from TSS |                    |                        |
|---------|-----------|----------|------------------|--------------------|------------------------|------------------|--------------------|------------------------|-------------------|--------------------|------------------------|-------------------|--------------------|------------------------|
|         | Genes     | DE Genes | Bound Genes      | Functionally Bound | Percent Not Functional | Bound Genes      | Functionally Bound | Percent Not Functional | Bound Genes       | Functionally Bound | Percent Not Functional | Bound Genes       | Functionally Bound | Percent Not Functional |
| ARNTL2  | 7414      | 772      | 330              | 33                 | 90.0%                  | 547              | 60                 | 89.0%                  | 695               | 79                 | 88.6%                  | 971               | 105                | 89.2%                  |
| BATF    | 7897      | 211      | 676              | 20                 | 97.0%                  | 1919             | 59                 | 96.9%                  | 2738              | 83                 | 97.0%                  | 3933              | 118                | 97.0%                  |
| BCL3    | 8158      | 532      | 929              | 55                 | 94.1%                  | 1672             | 112                | 93.3%                  | 2271              | 145                | 93.6%                  | 3178              | 199                | 93.7%                  |
| CLOCK   | 7394      | 522      | 333              | 24                 | 92.8%                  | 548              | 40                 | 92.7%                  | 693               | 49                 | 92.9%                  | 972               | 73                 | 92.5%                  |
| E2F1    | 7259      | 452      | 565              | 36                 | 93.6%                  | 782              | 53                 | 93.2%                  | 962               | 71                 | 92.6%                  | 1286              | 86                 | 93.3%                  |
| E2F4    | 7387      | 536      | 1588             | 107                | 93.3%                  | 2088             | 148                | 92.9%                  | 2474              | 185                | 92.5%                  | 3003              | 225                | 92.5%                  |
| EP300   | 7999      | 2919     | 1210             | 439                | 63.7%                  | 2031             | 771                | 62.0%                  | 2628              | 1002               | 61.9%                  | 3457              | 1311               | 62.1%                  |
| EZH2    | 7463      | 467      | 69               | 3                  | 95.7%                  | 161              | 12                 | 92.5%                  | 243               | 16                 | 93.4%                  | 381               | 23                 | 94.0%                  |
| IRF3    | 7848      | 113      | 152              | 2                  | 98.7%                  | 203              | 3                  | 98.5%                  | 248               | 5                  | 98.0%                  | 315               | 6                  | 98.1%                  |
| IRF4    | 7778      | 3892     | 1016             | 522                | 48.6%                  | 1903             | 1015               | 46.7%                  | 2564              | 1374               | 46.4%                  | 3520              | 1865               | 47.0%                  |
| IRF8    | 7831      | 67       | 305              | 2                  | 99.3%                  | 796              | 9                  | 98.9%                  | 1274              | 12                 | 99.1%                  | 1962              | 14                 | 99.3%                  |
| JUND    | 7547      | 324      | 114              | 7                  | 93.9%                  | 364              | 16                 | 95.6%                  | 627               | 27                 | 95.7%                  | 1022              | 45                 | 95.6%                  |
| NFE2L1  | 7772      | 867      | 94               | 17                 | 81.9%                  | 256              | 36                 | 85.9%                  | 416               | 58                 | 86.1%                  | 736               | 84                 | 88.6%                  |
| NFKB2   | 8249      | 1177     | 416              | 69                 | 83.4%                  | 792              | 144                | 81.8%                  | 1098              | 194                | 82.3%                  | 1597              | 273                | 82.9%                  |
| NFYC    | 7728      | 188      | 1071             | 25                 | 97.7%                  | 1645             | 35                 | 97.9%                  | 2110              | 45                 | 97.9%                  | 2760              | 67                 | 97.6%                  |
| PAX5    | 8006      | 2483     | 2272             | 748                | 67.1%                  | 3387             | 1147               | 66.1%                  | 4156              | 1374               | 66.9%                  | 5078              | 1663               | 67.3%                  |
| POU2F1  | 7581      | 688      | 343              | 39                 | 88.6%                  | 1111             | 129                | 88.4%                  | 1713              | 190                | 88.9%                  | 2635              | 287                | 89.1%                  |
| POU2F2  | 7238      | 859      | 2822             | 334                | 88.2%                  | 3963             | 475                | 88.0%                  | 4696              | 563                | 88.0%                  | 5532              | 653                | 88.2%                  |
| RAD21   | 8005      | 2780     | 1204             | 449                | 62.7%                  | 2622             | 1003               | 61.7%                  | 3853              | 1424               | 63.0%                  | 5457              | 1974               | 63.8%                  |
| RELA    | 7789      | 438      | 1251             | 87                 | 93.0%                  | 2127             | 138                | 93.5%                  | 2742              | 170                | 93.8%                  | 3605              | 229                | 93.6%                  |
| RXRA    | 7843      | 232      | 1037             | 30                 | 97.1%                  | 1833             | 57                 | 96.9%                  | 2377              | 75                 | 96.8%                  | 3227              | 106                | 96.7%                  |
| SP1     | 7850      | 3674     | 4041             | 1898               | 53.0%                  | 5181             | 2456               | 52.6%                  | 5812              | 2763               | 52.5%                  | 6410              | 3018               | 52.9%                  |
| SP3     | 7677      | 877      | 2943             | 358                | 87.8%                  | 3851             | 486                | 87.4%                  | 4452              | 549                | 87.7%                  | 5101              | 624                | 87.8%                  |
| TAF1    | 7854      | 800      | 3781             | 374                | 90.1%                  | 4743             | 464                | 90.2%                  | 5313              | 520                | 90.2%                  | 5904              | 580                | 90.2%                  |
| TCF12   | 7874      | 958      | 3123             | 424                | 86.4%                  | 4472             | 603                | 86.5%                  | 5261              | 704                | 86.6%                  | 6028              | 784                | 87.0%                  |
| TFDP1   | 7364      | 1178     | 186              | 38                 | 79.6%                  | 274              | 47                 | 82.8%                  | 341               | 52                 | 84.8%                  | 446               | 67                 | 85.0%                  |
| TFDP2   | 7139      | 787      | 497              | 60                 | 87.9%                  | 689              | 86                 | 87.5%                  | 841               | 101                | 88.0%                  | 1136              | 126                | 88.9%                  |
| USF1    | 7972      | 547      | 1702             | 142                | 91.7%                  | 2483             | 196                | 92.1%                  | 3047              | 235                | 92.3%                  | 3773              | 279                | 92.6%                  |
| YY1     | 7976      | 1868     | 3858             | 947                | 75.5%                  | 5136             | 1255               | 75.6%                  | 5842              | 1418               | 75.7%                  | 6573              | 1567               | 76.2%                  |
| Minimum |           |          |                  |                    | 48.6%                  |                  |                    | 46.7%                  |                   |                    | 46.4%                  |                   |                    | 47.0%                  |
| Maximum |           |          |                  |                    | 99.3%                  |                  |                    | 98.9%                  |                   |                    | 99.1%                  |                   |                    | 99.3%                  |
| Median  |           |          |                  |                    | 90.0%                  |                  |                    | 89.0%                  |                   |                    | 88.9%                  |                   |                    | 89.2%                  |
